# Supplementary material
Source: publisher figshare collection journal article supplement (https://tandf.figshare.com/ndownloader/files/14004596)
Supplement: Supplementary file 1 [file 14004596]

Hydrolysis kinetics of silane coupling agents studied by near-infrared spectroscopy plus partial least squares model

**Qianqian Zhaia,*, Zhihua Lua, Jing Wanga, Weina Wanga, Yudong Maa, Caili Yueb, and Yanling Zhaob**

aDepartment of Physics and Information Engineering, Jining University, Jining 273155, People’s Republic of China

bSchool of Materials Science and Engineering, Shandong University, Jinan 250061, People’s Republic of China

Email: [nobelqqzhai_2012@163.com](mailto:nobelqqzhai_2012@163.com)

**Supplemental Materials**

**
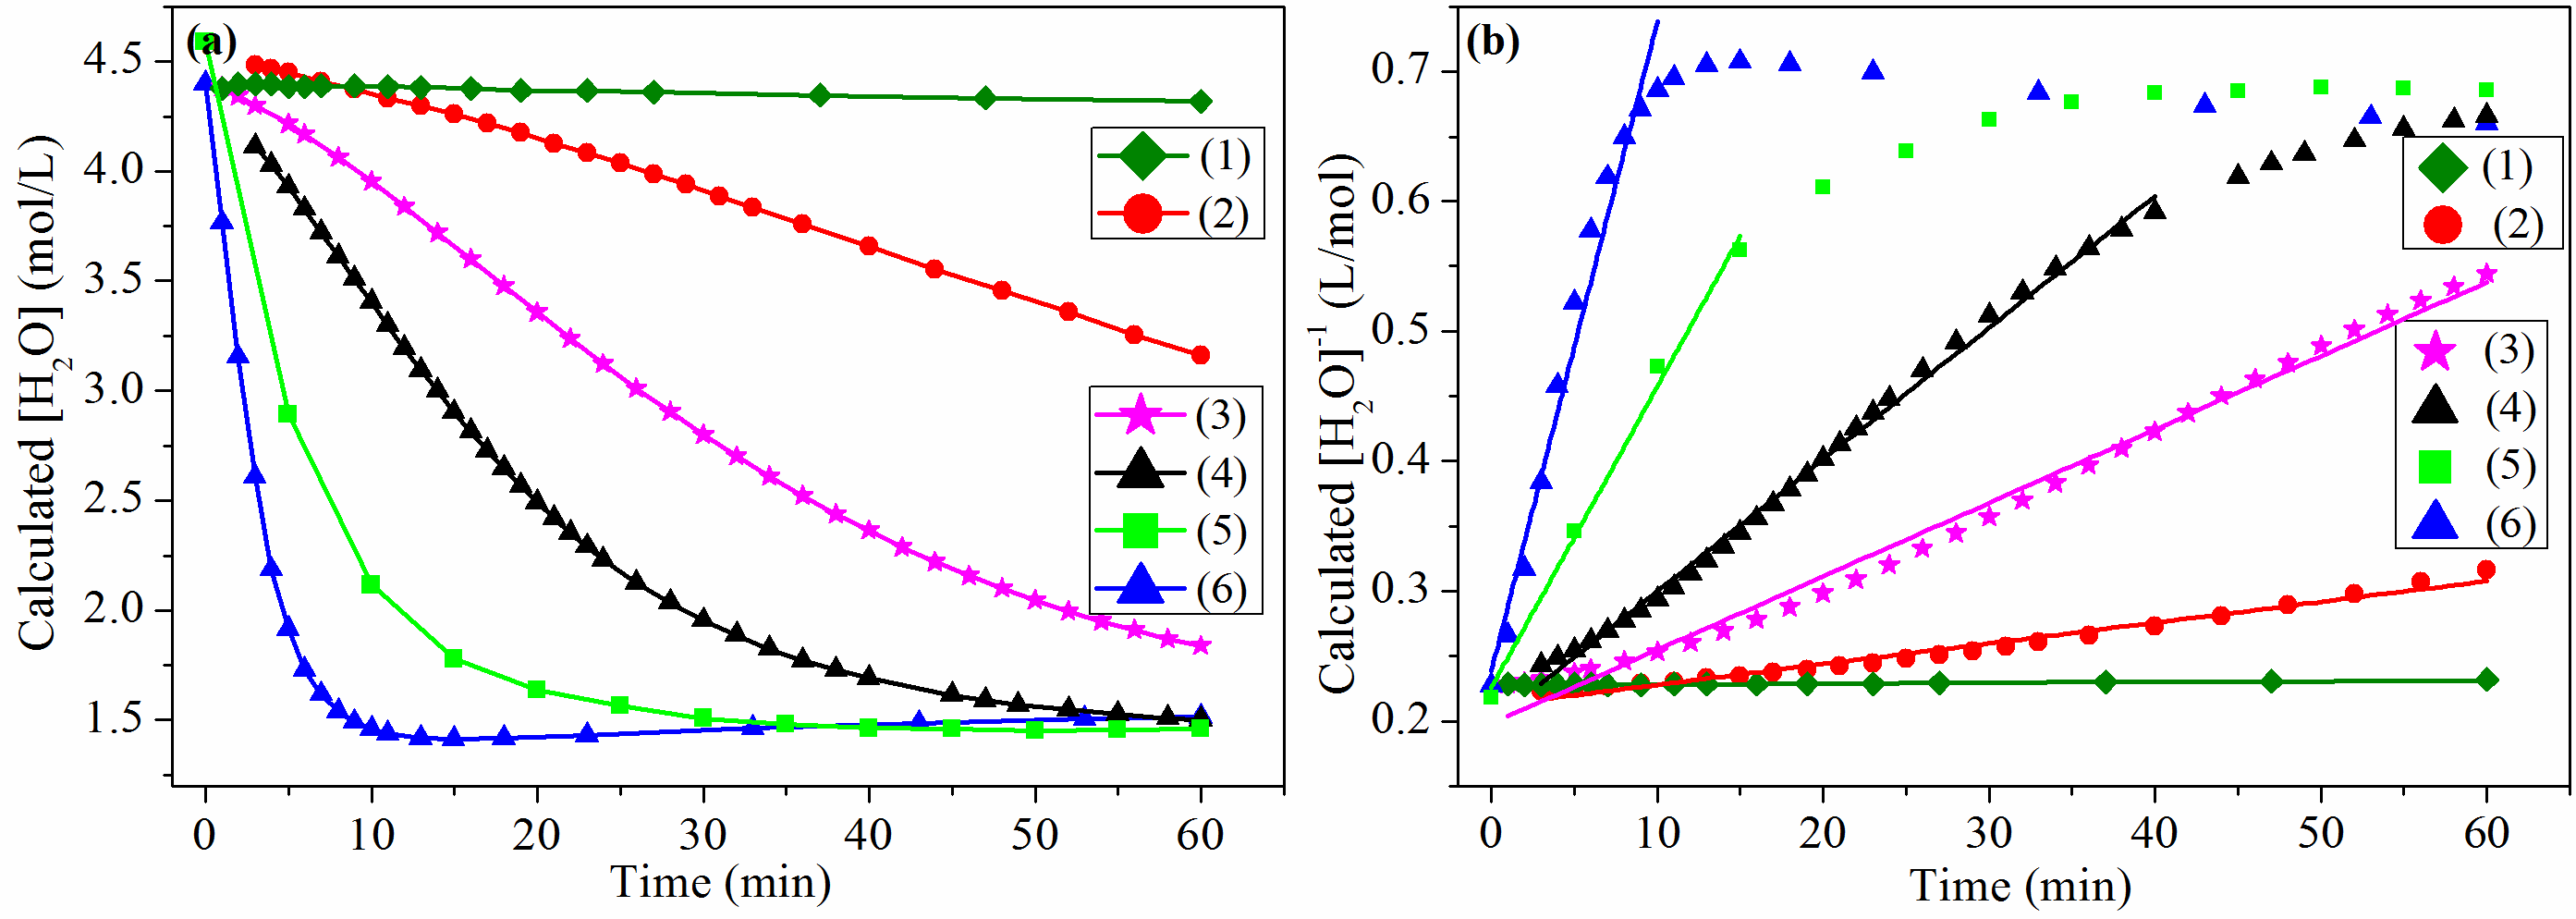
**

**Figure S 1:** Calculated [H2O] (a) and [H2O]-1(b) during the hydrolysis processes of VTES at 15 ºC with different [H+]: (1) 0, (2) 1.43x10-4 mol/L, (3) 2.86x10-4 mol/L, (4) 5.71x10-4 mol/L, (5) 1.31x10-3 mol/L, (6) 2.86x10-3 mol/L.


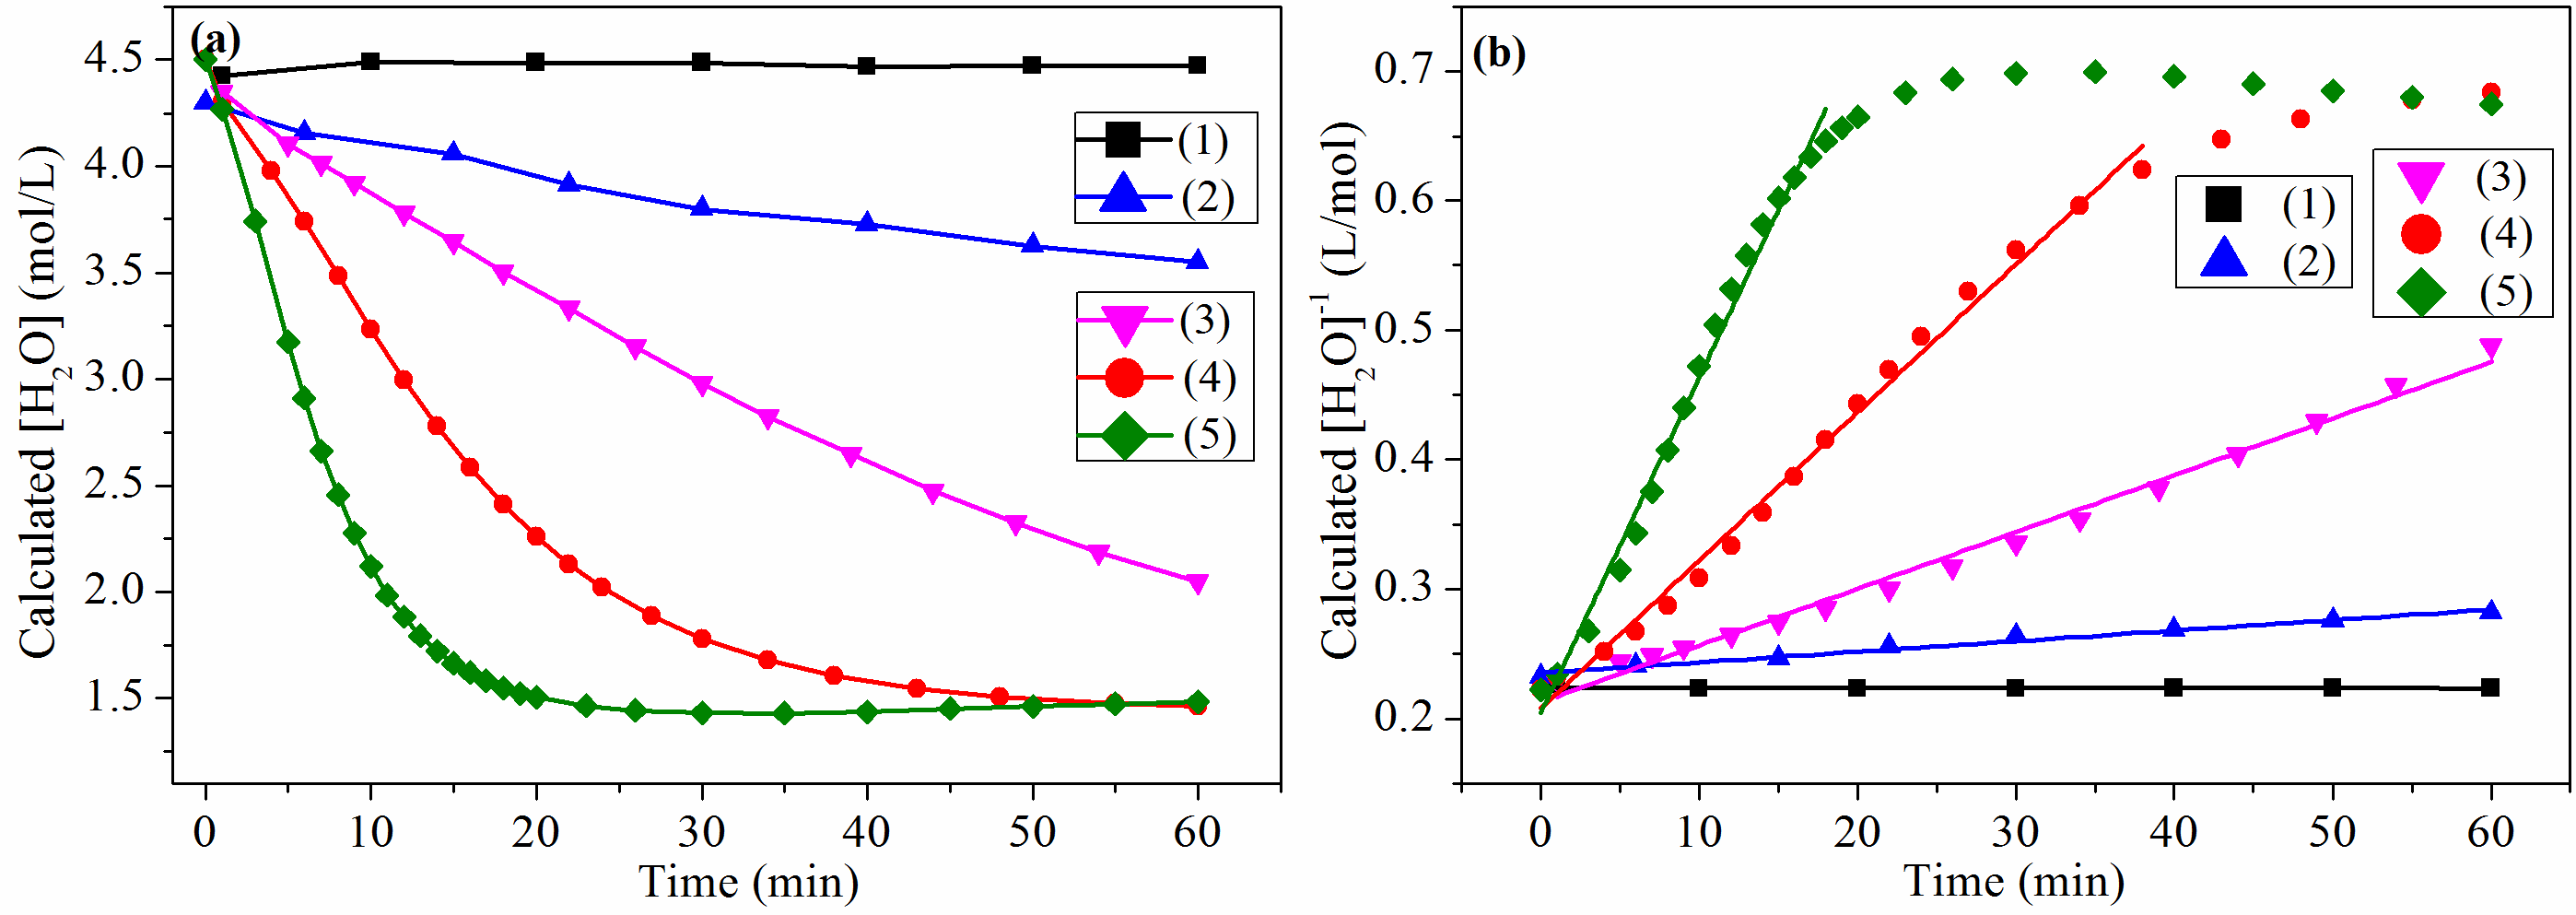


**Figure S 2:** Calculated [H2O] (a) and [H2O]-1(b) during the hydrolysis processes of 3-MTES at 15 ºC with different [H+]: (1) 0, (2) 2.63x10-4 mol/L, (3) 5.26x10-4 mol/L, (4) 1.31x10-3 mol/L, (5) 2.63x10-3 mol/L.

**
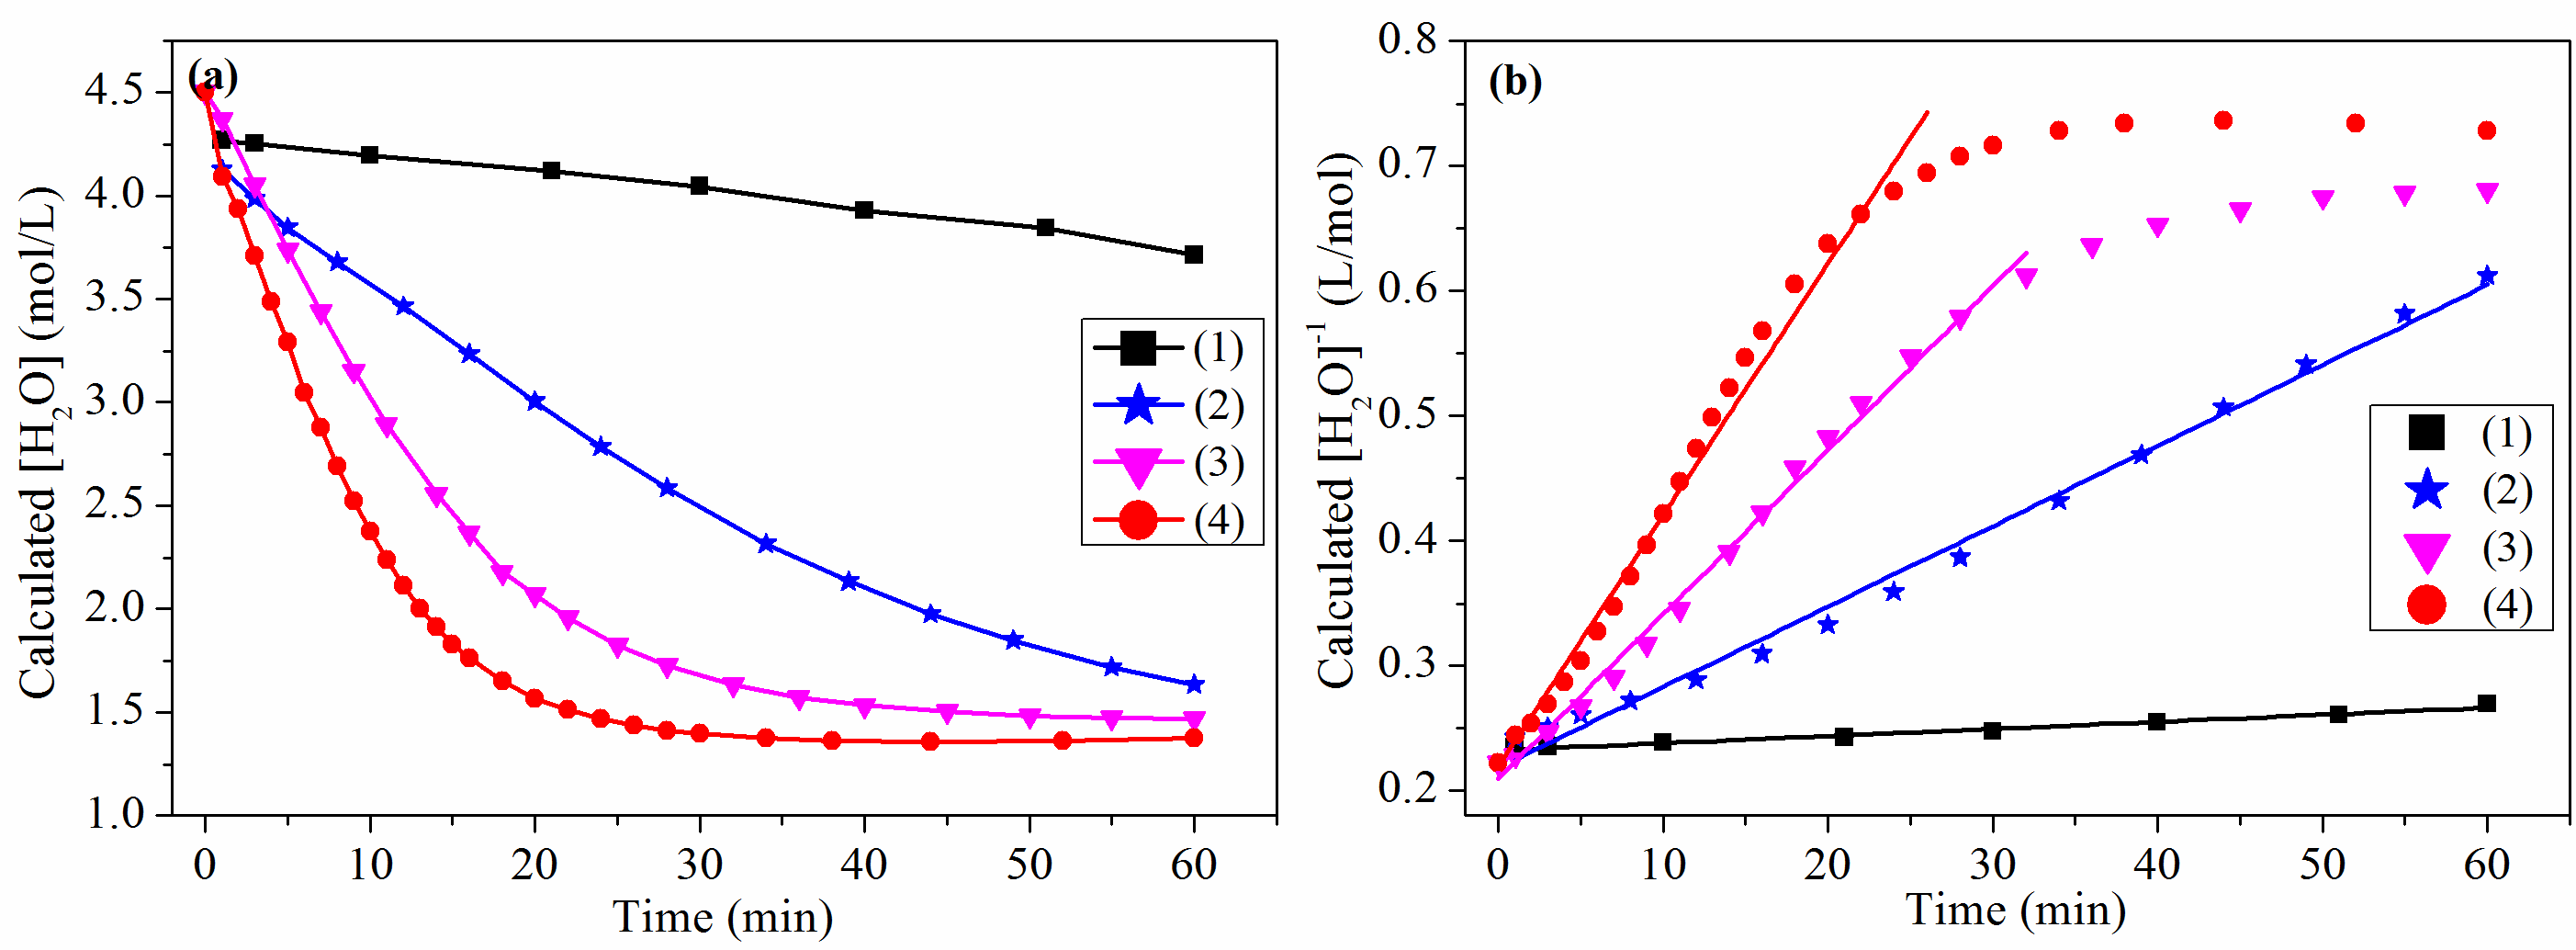
**

**Figure S 3:** Calculated [H2O] (a) and [H2O]-1(b) during the hydrolysis processes of 3-CTES at 15 ºC with different [H+]: (1) 0, (2) 5.28x10-4 mol/L, (3) 1.31x10-3 mol/L, (4) 2.64x10-3 mol/L.

**
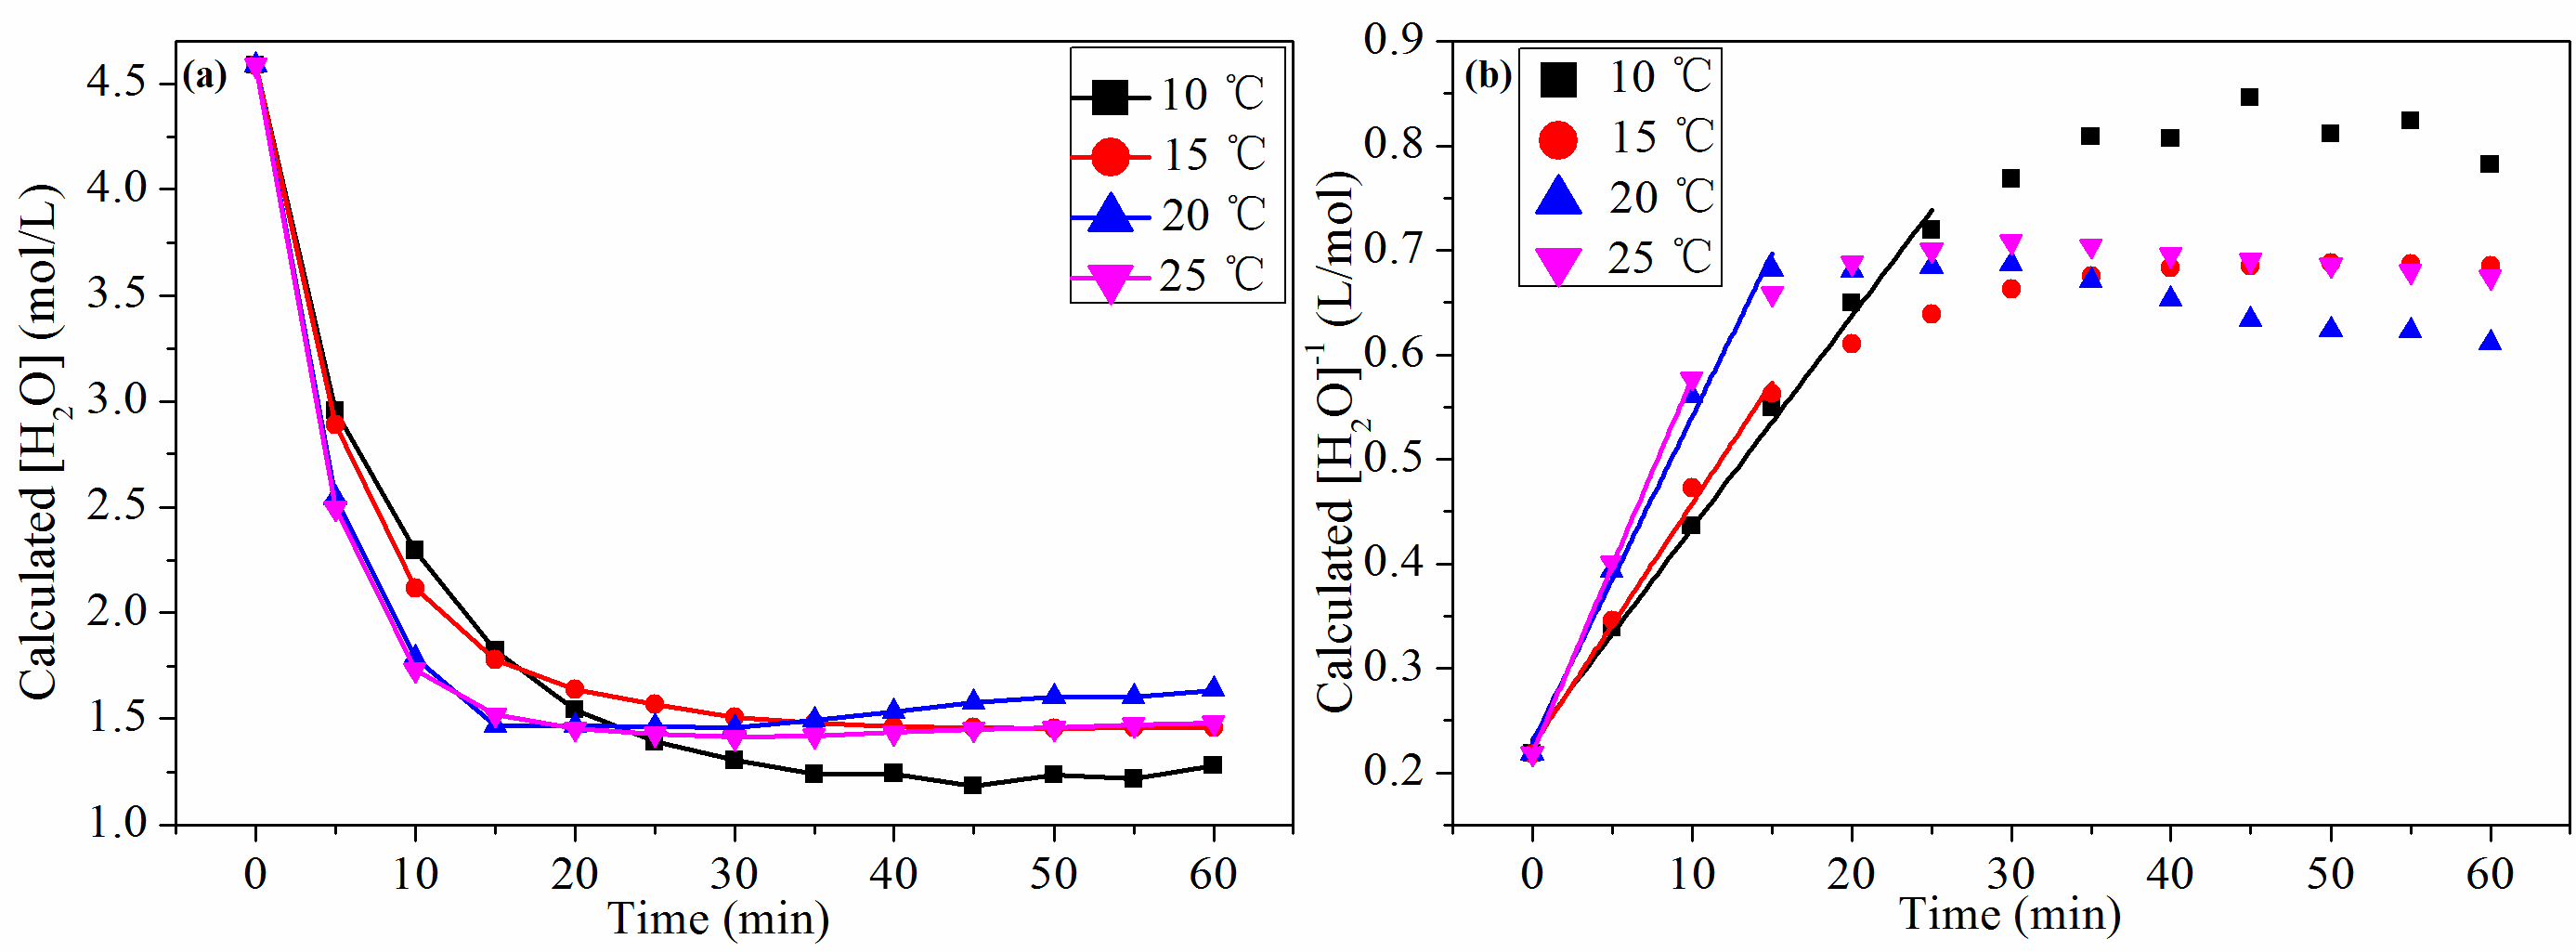
**

**Figure S 4:** Calculated [H2O] (a) and [H2O]-1(b) during the hydrolysis processes of VTES under different temperatures and [H+] is 1.31×10-3 mol·L-1.

**
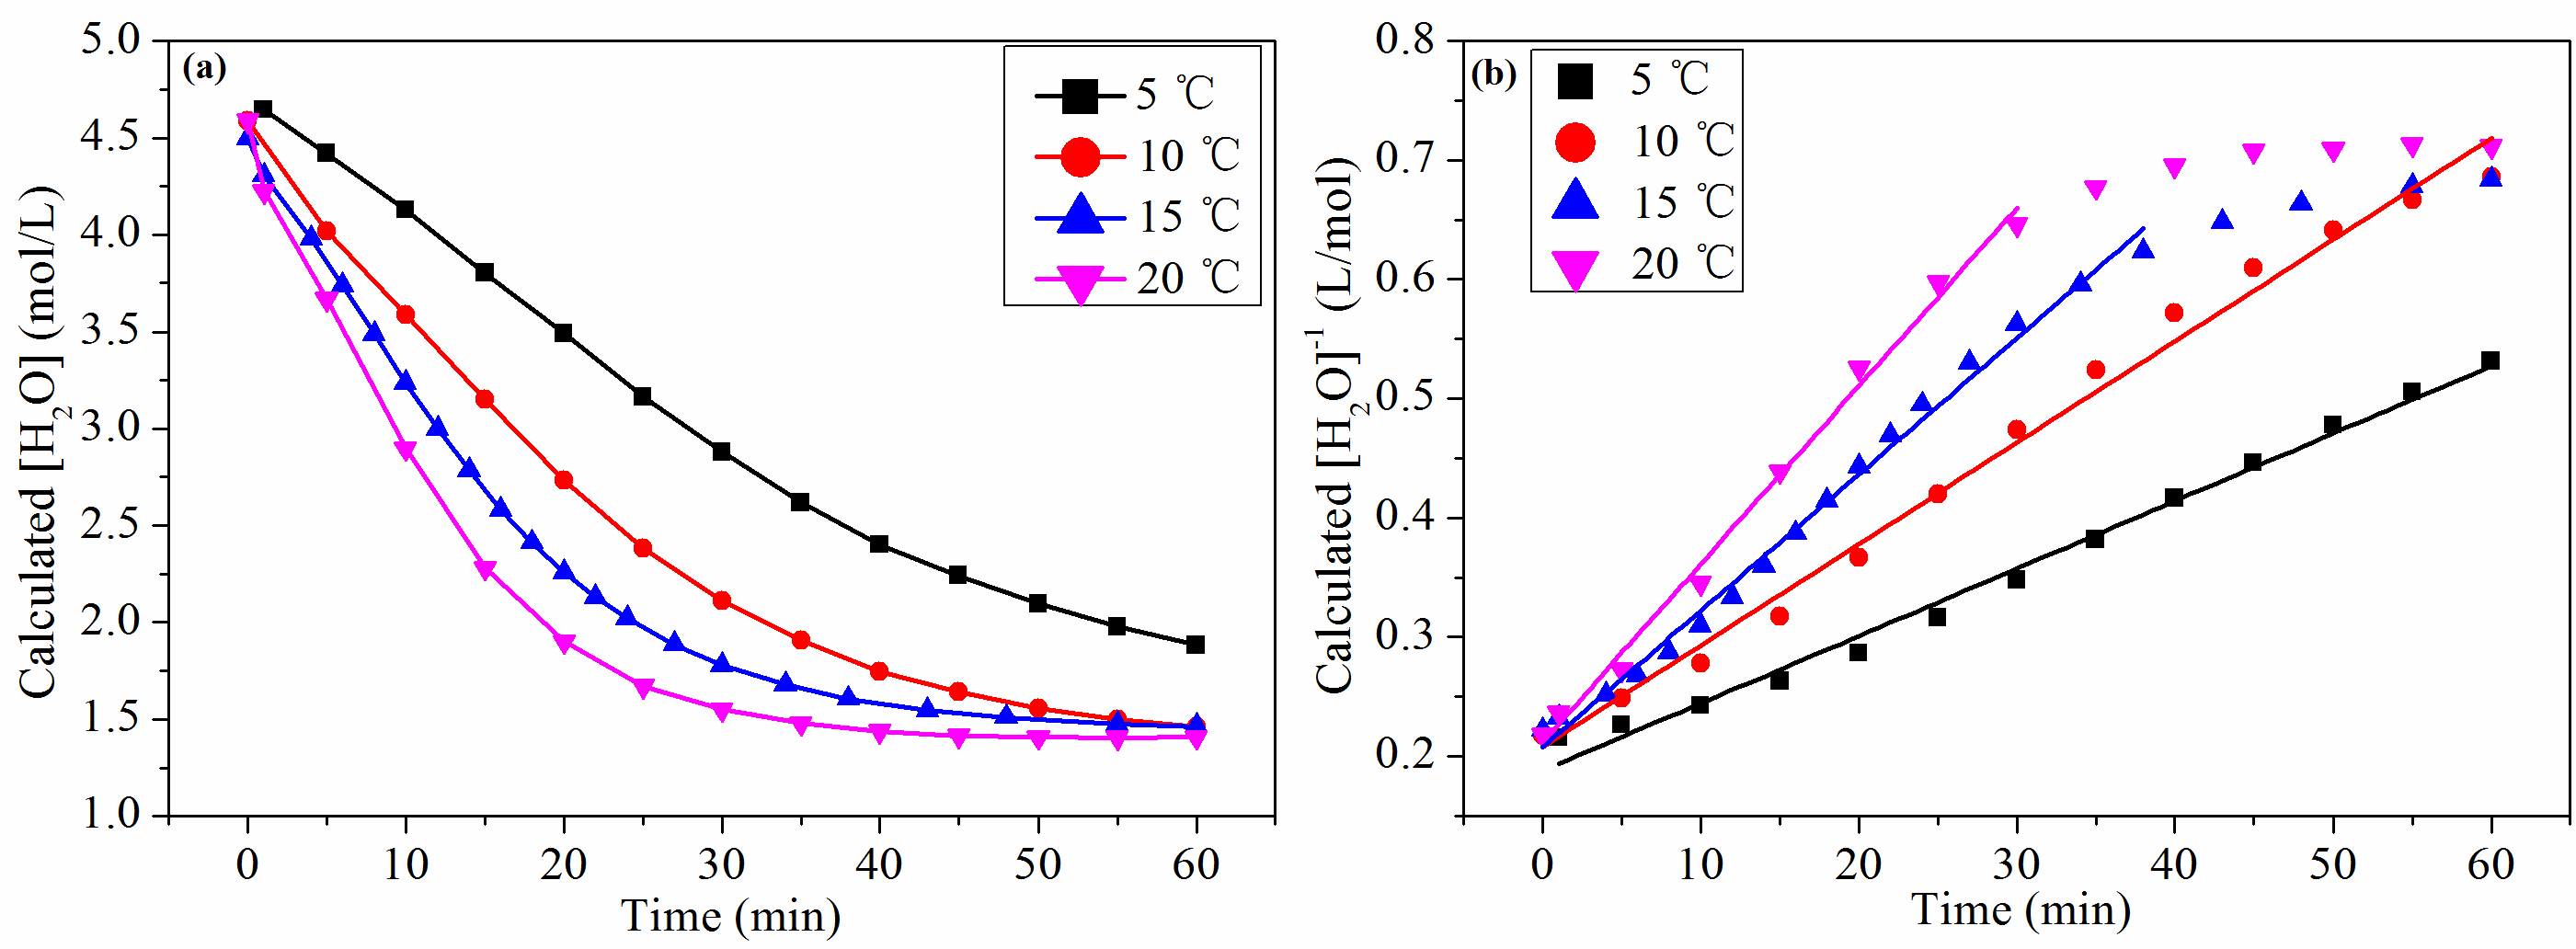
**

**Figure S 5:** Calculated [H2O] (a) and [H2O]-1(b) during the hydrolysis processes of 3-MTES under different temperatures and [H+] is 1.31×10-3 mol·L-1.

**
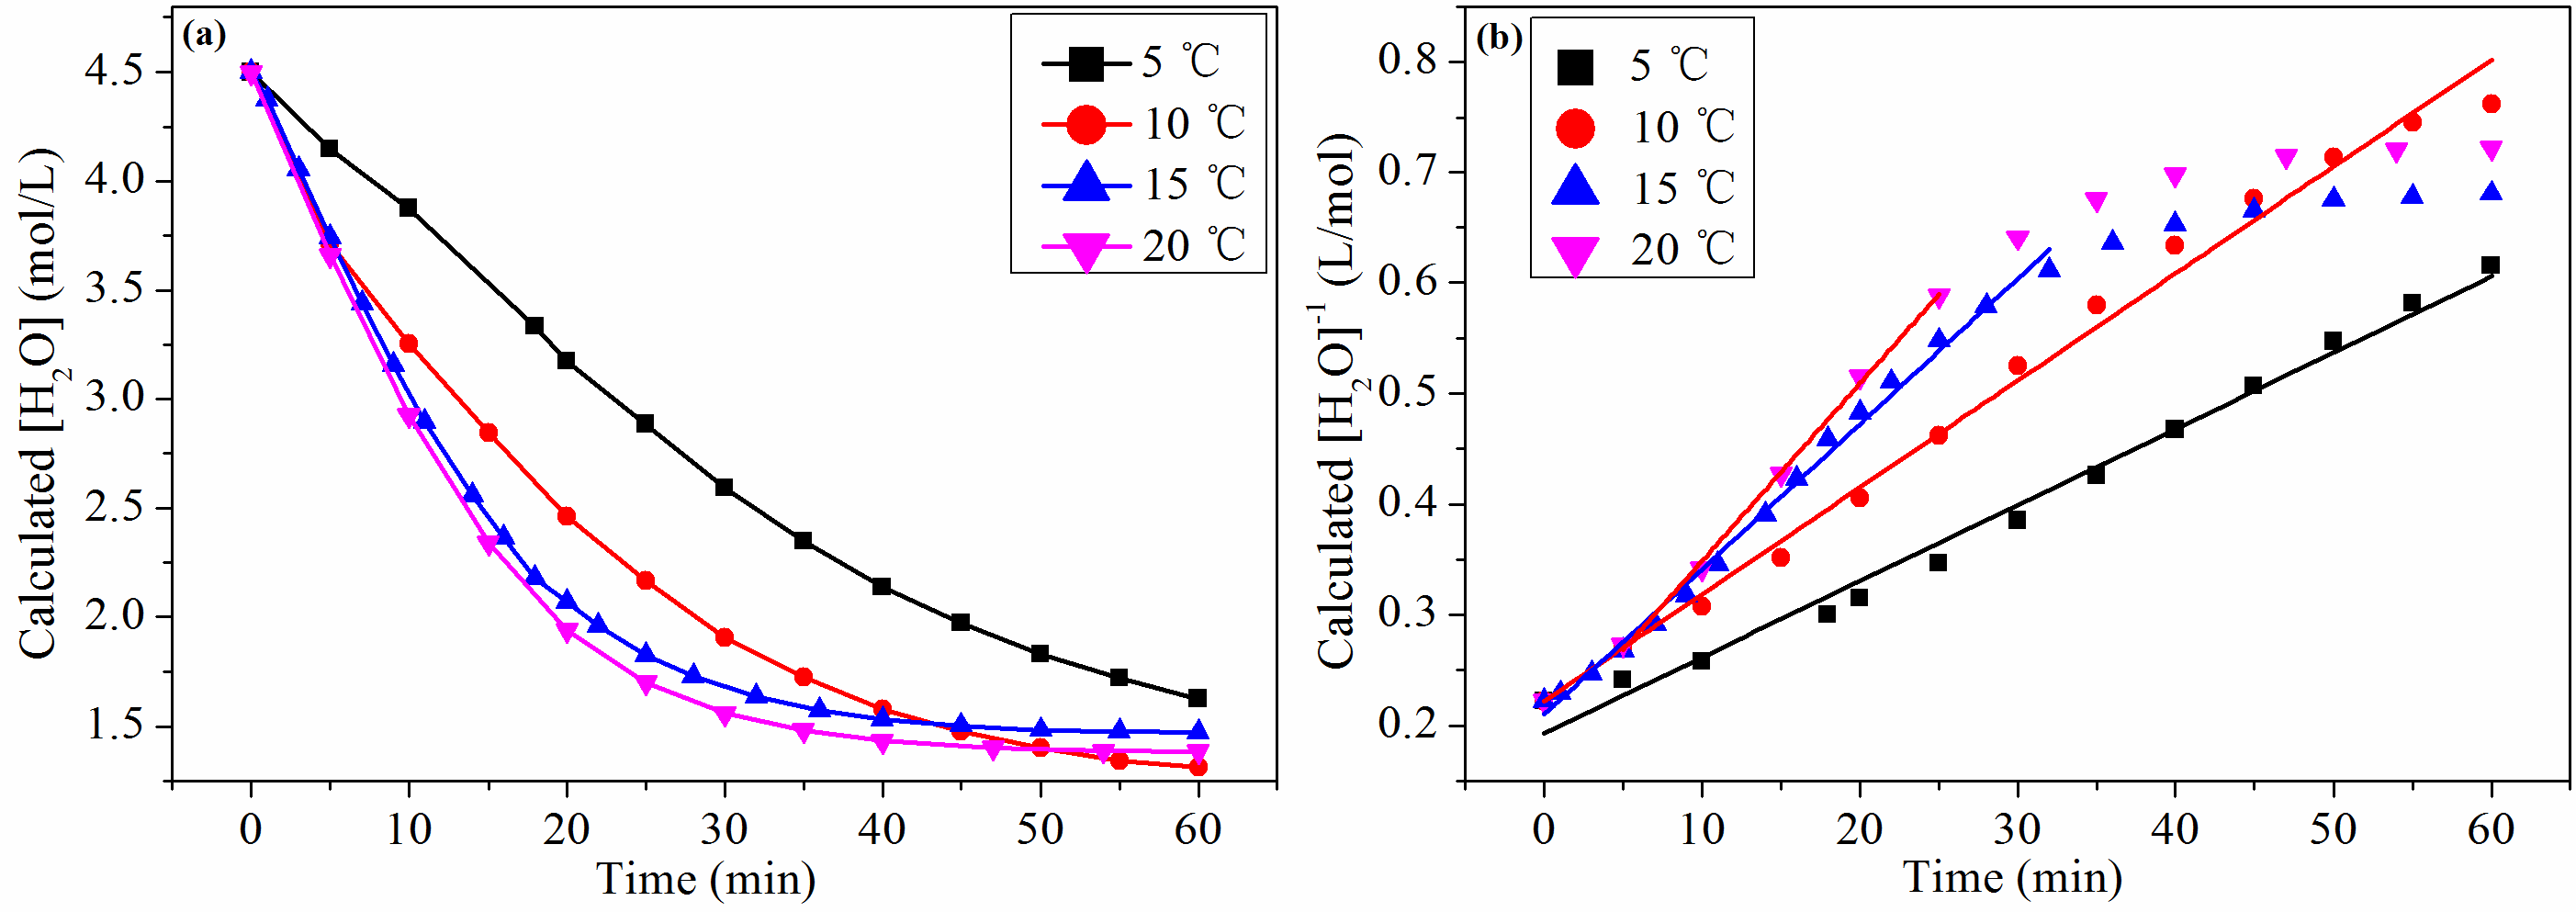
**

**Figure S 6:** Calculated [H2O] (a) and [H2O]-1(b) during the hydrolysis processes of 3-CTES under different temperatures and [H+] is 1.31×10-3 mol·L-1.
